# Supplementary material for: Divergent Viruses Discovered in Swine Alter the Understanding of Evolutionary History and Genetic Diversity of the Respirovirus Genus and Related Porcine Parainfluenza Viruses
Source: PubMed Central journal article supplement (PMC9241844; doi:10.1128/spectrum.00242-22), 2022-06-01
Supplement: spectrum.00242-22-s001.pdf [file spectrum.00242-22-s001.pdf]

Fig.S1

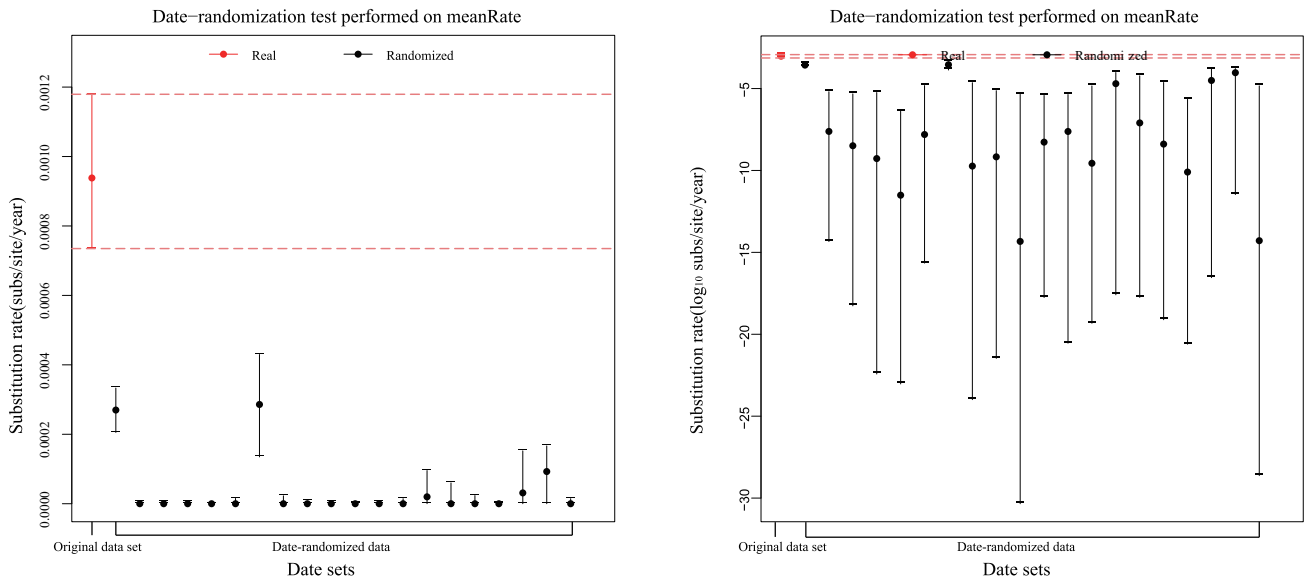

**Supplementary Figure 1. Data randomization test on the Respirivirus genus.** Comparison of the evolutionary rates of Respirivirus genus sequence set estimated using beast from both the original (red circle) and 20 date-randomized (black circles) data sets from the DRT (date-randomization test).

Fig.S2

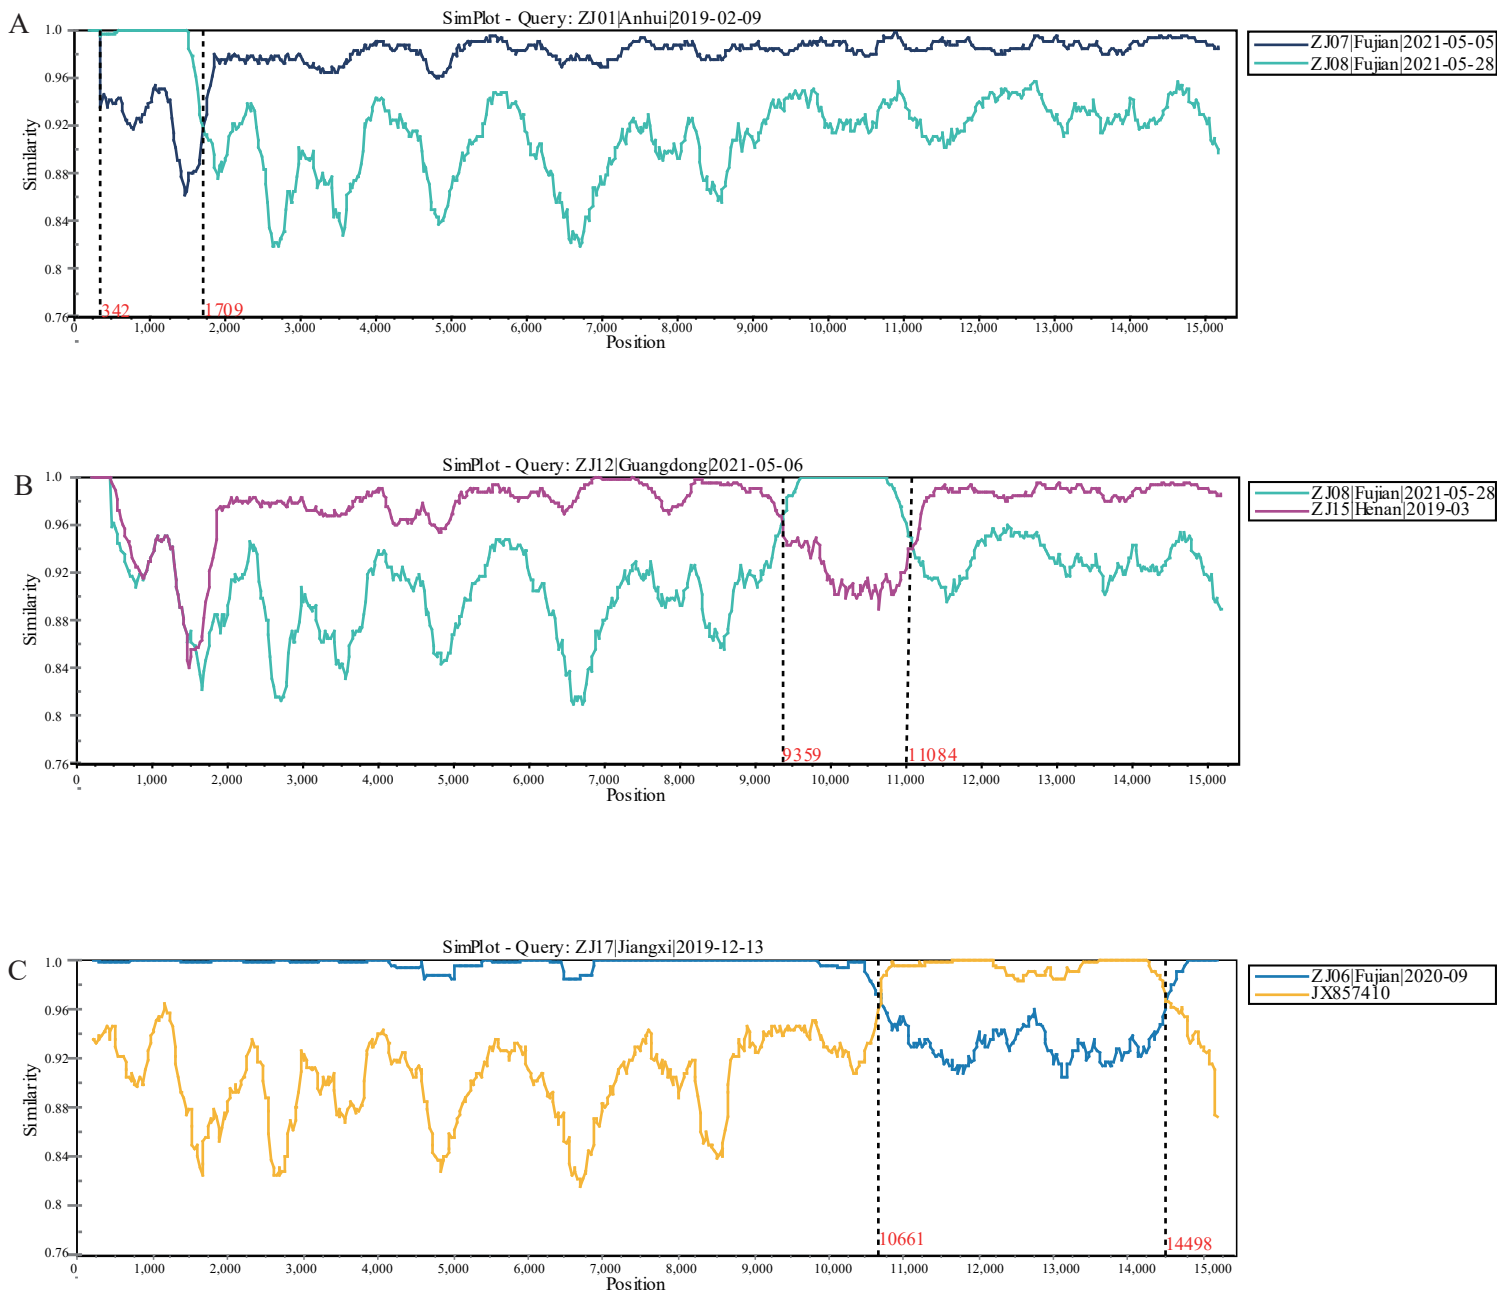

**Supplementary Figure 2. Verification of recombination events and determination of recombination break-points.** (A) Recombination verification on the N gene of the ZI01 strain with ZJ07 and ZJ08 as parents. (B) Recombination verification of the small fragment on the L gene of the ZI12 strain with ZJ08 and ZJ15 as parents. (C) Recombination verification of the large fragment on the L gene of the ZI17 strain with ZJ06 and JX857410 as parents. Recombination breakpoints are marked with dashed lines.

Fig.S3

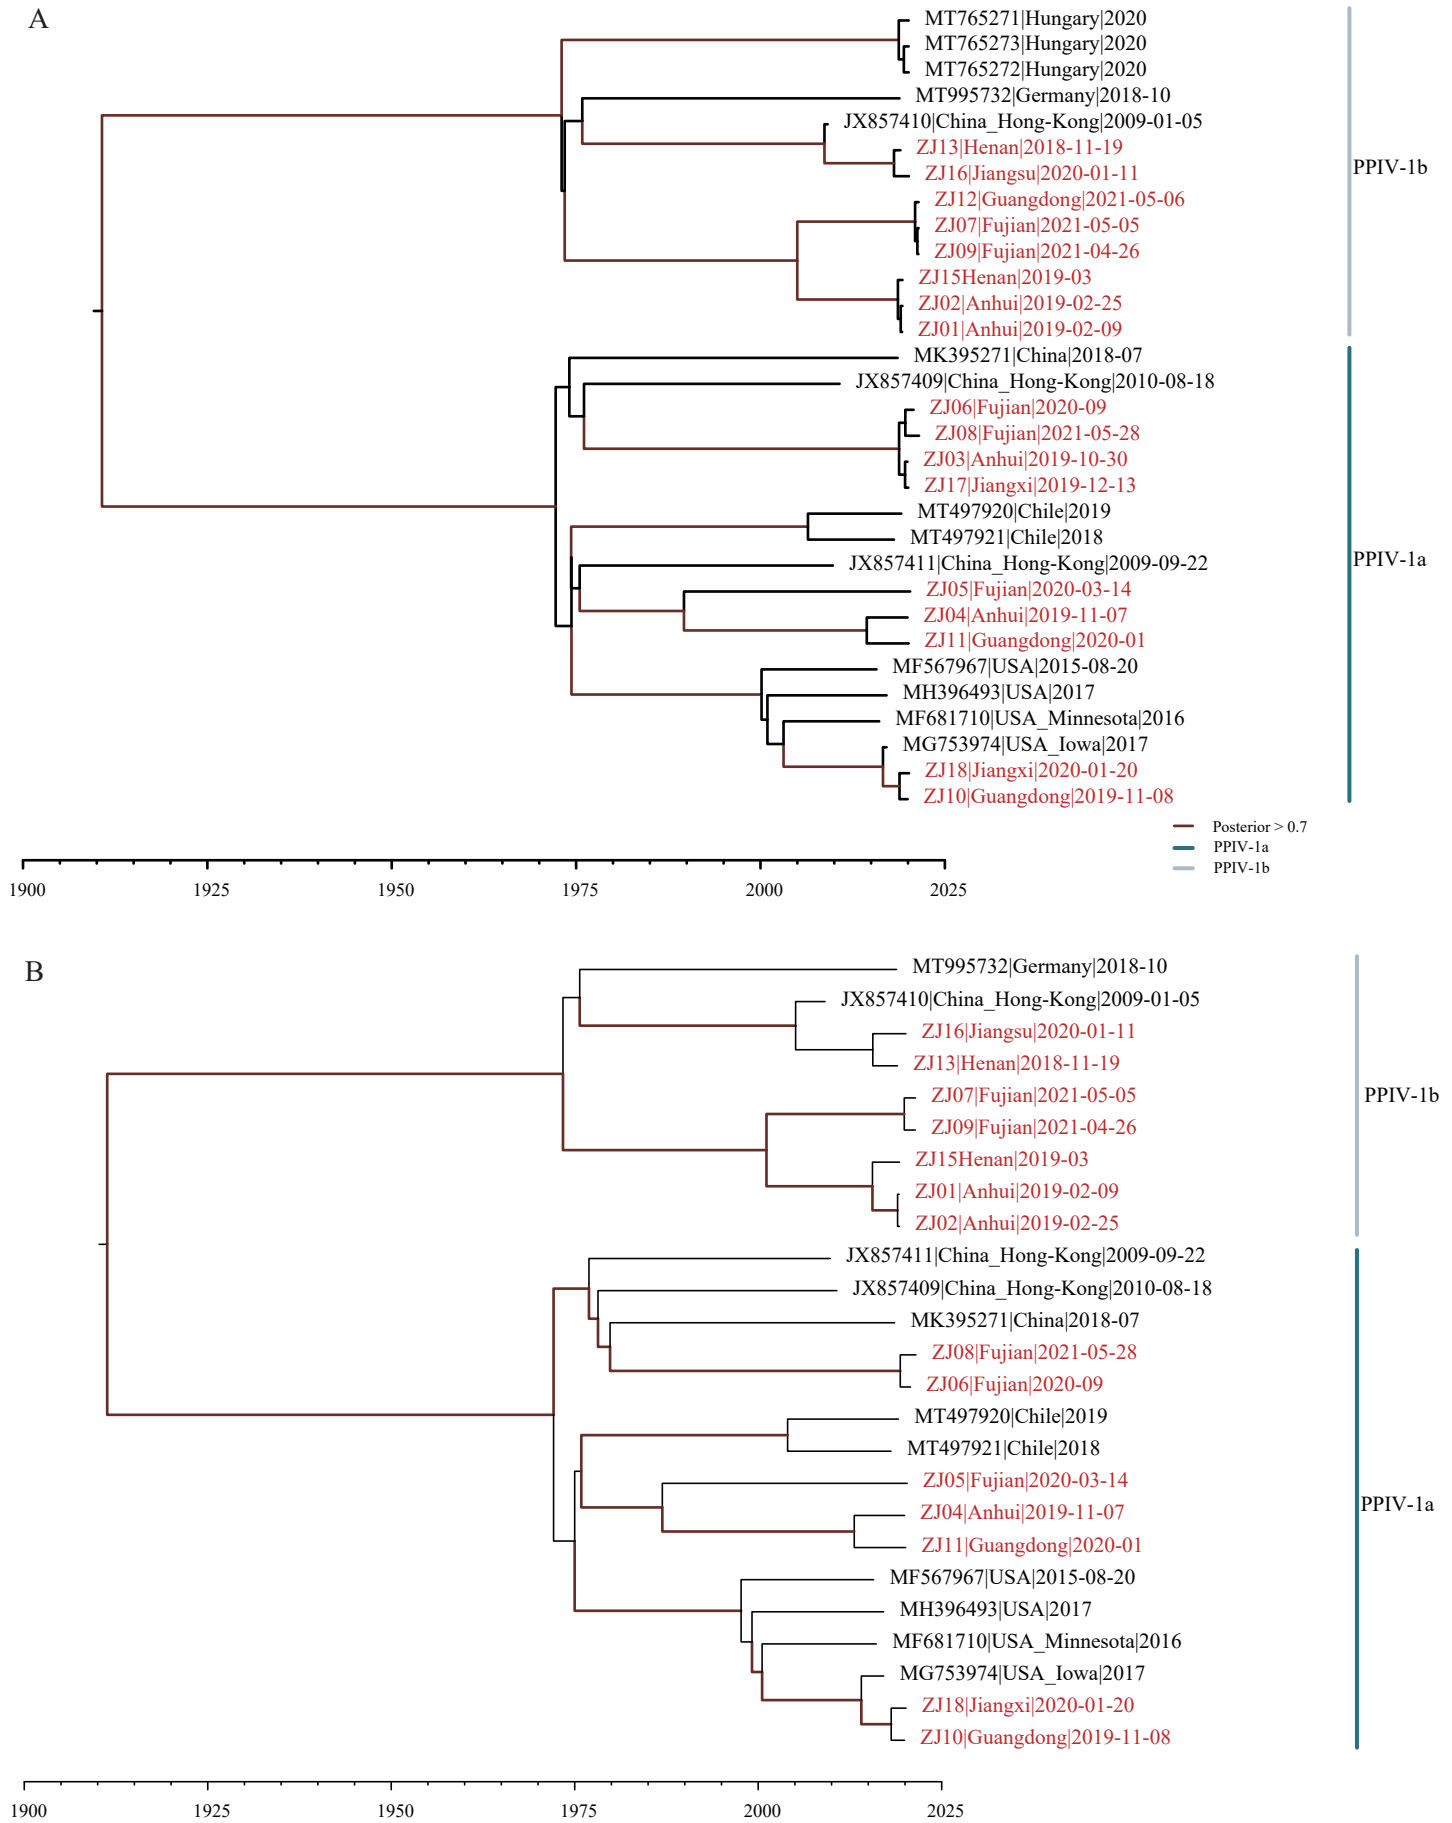

**Supplementary Figure 3. Maximum clade credibility tree of F and L genes.** The MCC tree inferred under an uncorrelated lognormal relaxed molecular clock and GTR +  $\Gamma$  nucleotide substitution model with Bayesian skygrid prior as the tree prior. (A) Maximum clade credibility tree of F gene. (B) Maximum clade credibility tree of L gene. Different colors on the branches represent different genotypes of PPIV-1.

Fig.S4

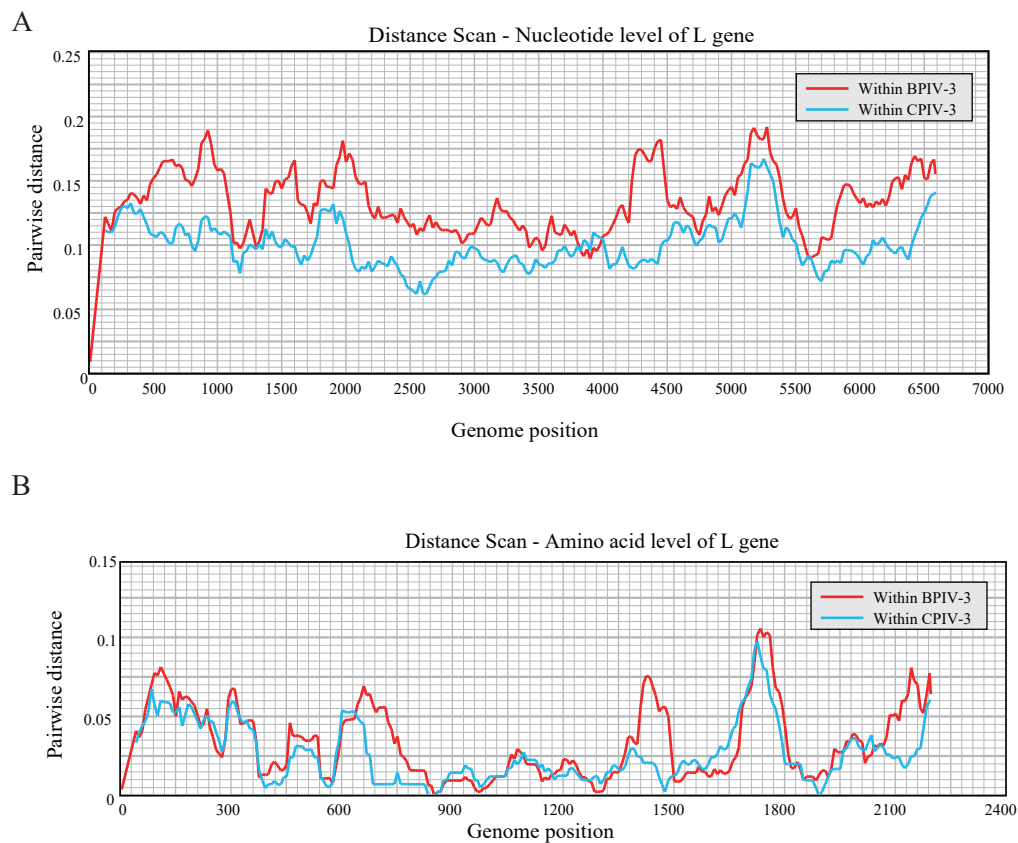

**Supplementary Figure 4. The intraspecies pairwise distance of the L gene nucleotide and amino acid sequences of CPIV-3 and BPIV-3.** We used SSE1.4 with a sliding window of 250 nucleotides, and a step size of 25 nucleotides to plot the pairwise distance within the species. (A) The intraspecies pairwise distance of the nucleotide sequences of L gene. (B) The intraspecies pairwise distance of amino acid sequences of the L gene. Different colors represent different species.

**Supplementary Table 1. Detection and amplification primers for PPIV-1 in this study**

| Primer Name | Sequence (5'-3')       | the corresponding gene | PCR product size (bp)     |
|-------------|------------------------|------------------------|---------------------------|
| PPIV-1-D-F  | GGTCTGCTTGCTCCAATCTTG  | L gene                 | 253 (Detection of PPIV-1) |
| PPIV-1-D-R  | AAGCATCTAGACATTGCCAT   |                        |                           |
| PPIV-1-C-1F | TACCTGGACAAAAGAACACCG  | N gene & P gene        | 2679                      |
| PPIV-1-C-1R | ATTACACCAAGACTCACTAAC  |                        |                           |
| PPIV-1-C-2F | TAATAATGGAGGAAGCCTGGA  | P gene & M gene        | 2422                      |
| PPIV-1-C-2R | GGATAACTTGTACCCTAAG    |                        |                           |
| PPIV-1-C-3F | CCACACATGAATTTAGTTAT   | F gene                 | 2447                      |
| PPIV-1-C-3R | GAGAGATCCTGGATTTTCTT   |                        |                           |
| PPIV-1-C-4F | TAAAGAAAACCTTAGGGTGCA  | H gene                 | 2377                      |
| PPIV-1-C-4R | CTACGCACATCTCTCCATAA   |                        |                           |
| PPIV-1-C-5F | AAGAAAAACCTTAGGTTGAATG | L gene                 | 2527                      |
| PPIV-1-C-5R | ACATCTTGCTACTTATAATTG  |                        |                           |
| PPIV-1-C-6F | CATCTAGCTGCTGTCAAGGT   | L gene                 | 2706                      |
| PPIV-1-C-6R | TGACTGTATCTCAATGTTGGAT |                        |                           |
| PPIV-1-C-7F | AAGAGATTCTGGGATTTCCGGT | L gene                 | 2193                      |
| PPIV-1-C-7R | AAGAGTTTAAGACATATCATT  |                        |                           |

**Supplementary Table 2. Sample information of PPIV-1 in this study**

| Strain | Collection date | Geographic origin | Sample Type | Farm No. | Accession No. |
|--------|-----------------|-------------------|-------------|----------|---------------|
| ZJ01   | 2019-Feb-09     | China Anhui       | lung        | 1        | OK044758      |
| ZJ02   | 2019-Feb-25     | China Anhui       | lung        | 2        | OK044759      |
| ZJ03   | 2019-Oct-30     | China Anhui       | swabs       | 3        | OK044760      |
| ZJ04   | 2019-Nov-07     | China Anhui       | swabs       | 4        | OK044761      |
| ZJ05   | 2020-Mar-14     | China Fujian      | swabs       | 5        | OK044762      |
| ZJ06   | 2020-Sep        | China Fujian      | swabs       | 6        | OK044763      |
| ZJ07   | 2021-May-05     | China Fujian      | swabs       | 7        | OK044764      |
| ZJ08   | 2021-May-28     | China Fujian      | swabs       | 8        | OK044765      |
| ZJ09   | 2021-Apr-26     | China Fujian      | swabs       | 9        | OK044766      |
| ZJ10   | 2019-Nov-08     | China Guangdong   | swabs       | 10       | OK044767      |
| ZJ11   | 2020-Jan        | China Guangdong   | swabs       | 11       | OK044768      |
| ZJ12   | 2021-May-06     | China Guangdong   | swabs       | 12       | OK044769      |
| ZJ13   | 2018-Nov-19     | China Henan       | swabs       | 13       | OK044770      |
| ZJ15   | 2019-Mar        | China Henan       | swabs       | 14       | OK044771      |
| ZJ16   | 2020-Jan-11     | China Jiangsu     | swabs       | 15       | OK044772      |
| ZJ17   | 2019-Dec-13     | China Jiangxi     | swabs       | 16       | OK044773      |
| ZJ18   | 2020-Jan-20     | China Jiangxi     | swabs       | 17       | OK044774      |
| ZJ14   | 2019-Feb        | China Henan       | lung        | 18       | OK044775      |
| ZJ19   | 2020-Apr-09     | China Shandong    | swabs       | 19       | OK044776      |
